# Supplementary material
Source: PubMed Central journal article supplement (PMC4002987)
Supplement: cmi201052x1.pdf [file cmi201052x1.pdf]

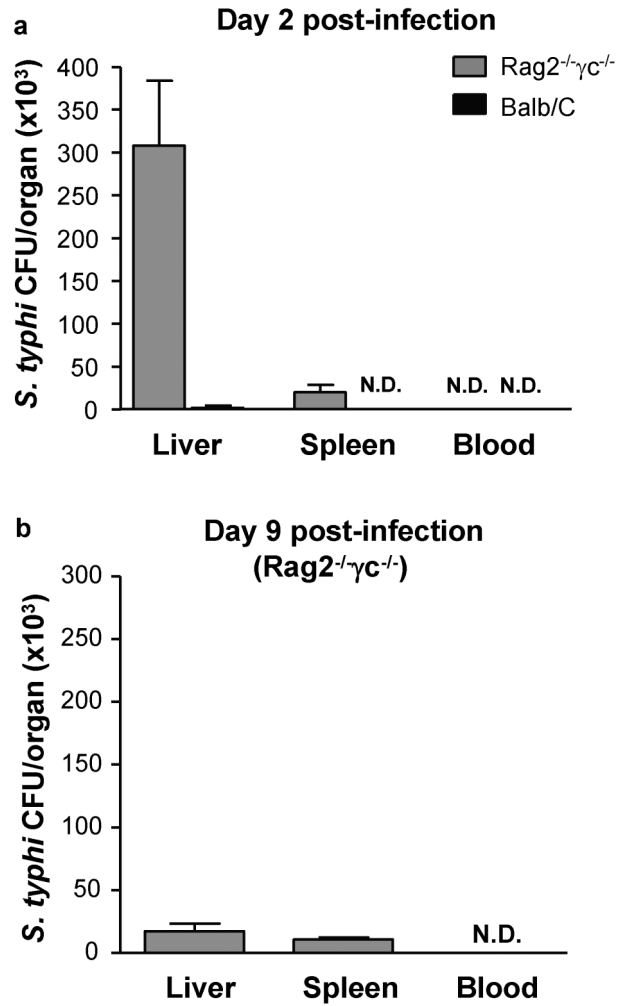

**Supplemental Figure 1** *S. typhi* CFU counts in background control mice infected *via* intravenous route. **(a)** RAG2<sup>-/-</sup>γc<sup>-/-</sup> and Balb/c mice ( $n=9$  or  $10$  per group) were injected intravenously with  $2 \times 10^6$  CFU of *S. typhi* and liver, spleen and blood were then isolated from the infected mice at day 2. The organs were homogenized and cultured individually on LB agar plates as mentioned previously. Bacterial CFU were enumerated after 16–20 h and analyzed. **(b)** RAG2<sup>-/-</sup>γc<sup>-/-</sup> mice ( $n=10$ ) were injected intravenously with  $2 \times 10^6$  CFU of *S. typhi* and liver, spleen and blood were then isolated from the infected mice at day 9 post-infection and the bacterial load in the organs were assessed. Data are means with standard errors from two separate experiments. CFU, colony-forming unit; LB, Luria–Bertani; *S. typhi*, *Salmonella enterica* serovar Typhi.
